# Supplementary material
Source: Springer Nature journal article supplement (https://www.springermedizin.de/resource/supplementary/12876_2010_451_MOESM12_ESM.pdf/9437038)

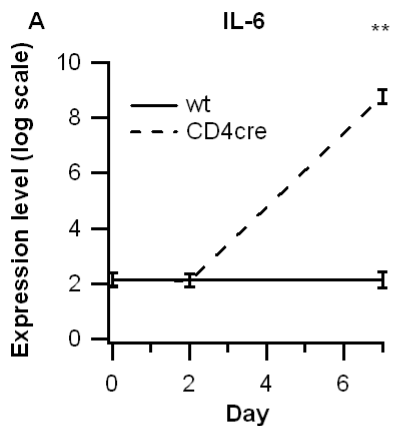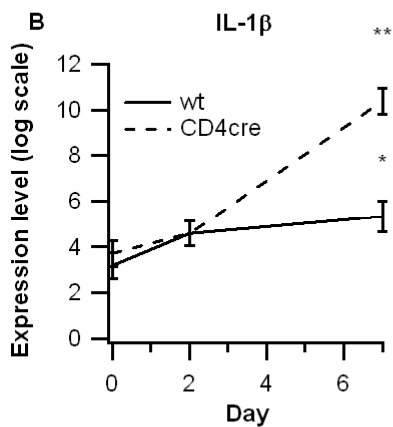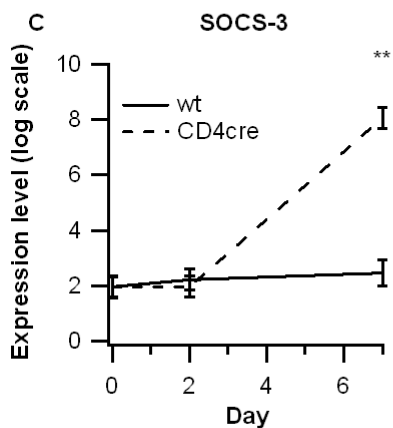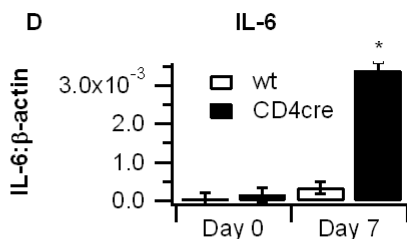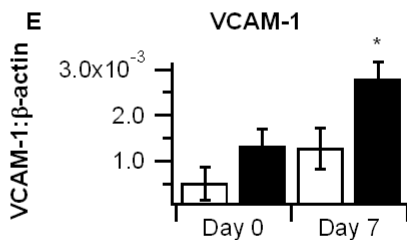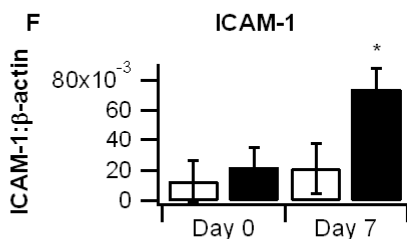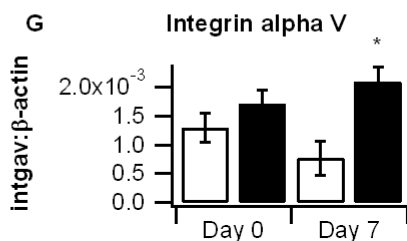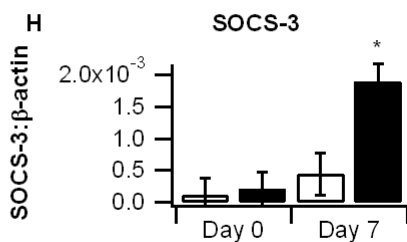

Supplement: MOESM12 [file 9437038]
